# Supplementary material for: Integrated Small RNA Sequencing, Transcriptome, and GWAS Data Reveal miRNA Regulation in Response to Milk Protein Traits in Chinese Holstein Cattle
Source: Research Square preprint supplement (doi:10.21203/rs.3.rs-143526/v1), 2021-01-13
Supplement: Supplementary file 1 [file c324fa37e4a435a115e0fddc.xlsx]

## Sheet: Sheet1
Group	Sample	Total clean reads				unique tags
		unmapped	mapped	strand	reverse	unmapping	mapped	strand	reverse
HD	HD_1	0.0457395	0.95426	0.649667	0.304594	0.240724	0.759276	0.467615	0.291661
	HD_2	0.0604327	0.939567	0.685459	0.254109	0.30913	0.69087	0.430208	0.260662
	HD_3	0.0406744	0.959326	0.621845	0.33748	0.212821	0.787179	0.483348	0.303831
HP	HP_1	0.0625266	0.937473	0.714515	0.222959	0.247401	0.752599	0.473198	0.279401
	HP_2	0.105639	0.894361	0.675464	0.218896	0.277512	0.722488	0.451277	0.271211
	HP_3	0.0961889	0.903811	0.691499	0.212312	0.280354	0.719646	0.451306	0.26834
LD	LD_1	0.0789493	0.921051	0.710271	0.21078	0.183333	0.816667	0.496983	0.319684
	LD_2	0.0517302	0.94827	0.657327	0.290943	0.269709	0.730291	0.4492	0.281091
	LD_3	0.0756734	0.924327	0.698653	0.225673	0.220982	0.779018	0.475081	0.303937
LP	LP_1	0.437906	0.562094	0.435815	0.126279	0.318923	0.681077	0.439181	0.241896
	LP_2	0.0707269	0.929273	0.739124	0.190149	0.263013	0.736987	0.465993	0.270994
	LP_3	0.0721025	0.927898	0.746686	0.181211	0.242652	0.757348	0.474211	0.283137
